# Supplementary material
Source: bioRxiv or medRxiv preprint supplement (https://www.biorxiv.org/highwire/filestream/42831/field_highwire_adjunct_files/0/001016-1.pdf)
Supplement: Supplementary file [file 001016-1.pdf]

## SUPPLEMENTARY TEXT

### Examples of calculating genotypic historical predictability

#### Haploid example

As a concrete example of how we measure historical predictability, we will use a system of two mutations,  $m_1$  and  $m_2$ . Let  $A^{wt}$  be the ancestral allele,  $A^1$  be the allele containing mutation  $m_1$ ,  $A^2$  be the allele with  $m_2$  and  $A^{1,2} = A^{der}$  be the the derived allele containing both available mutations  $m_1$  and  $m_2$ .

There are  $2! = 2$  different orders of mutations that can generate allele  $A^{der}$ . In the mutation order under consideration,  $m_1$  occurs first, then  $m_2$ :

$$M_1 = A^{wt} \xrightarrow{m_1} A^1 \xrightarrow{m_2} A^{der}$$

the remaining mutation order is:

$$M_2 = A^{wt} \xrightarrow{m_2} A^2 \xrightarrow{m_1} A^{der}$$

Let us first consider the method of WEINREICH *et al.* (2006), using example data in Table S1, the results of which are shown in Figure S1. Using our recursive procedure, we start with  $S_{existing} = A^{wt}$  at fixation.

There are two possible mutations in this population, where  $m_1$  occurs on  $A^{wt}$  to get  $A^1$  and where  $m_2$  occurs on  $A^{wt}$  to get  $A^2$ . We compute the unconditioned probability of allele  $A^1$  successfully being generated and invading the population,  $\rho_{A^1}$  on  $S_{existing}$  and similarly for  $A^2$ . These are 0.3 and 0.5, respectively.

We then compute the conditioned probabilities of success for these alleles. For  $A^1$ , this is  $\frac{0.3}{0.3+0.5} = 0.375$ , while it is  $\frac{0.5}{0.3+0.5} = 0.625$  for  $A^2$  (Table S1). In essence, a single successful mutation in

$S_{existing}$  ( $A^{wt}$  fixed in the population) will generate an  $S_{new}$  of  $A^1$  fixed in the population 0.375 of the time,

and an  $S_{new}$  of  $A^2$  fixed in the population 0.625 of the time. From here, we can then do the recursive call

for the next step of the inference procedure for each of these new population states. These two recursive

calls will be: 1)  $S_{new} = A^1$  fixed in the population, with  $A_{new} = A^{wt}, A^1$  and  $P_{new} = 1 * 0.375 = 0.375$  and

2)  $S_{new} = A^2$  fixed in the population, with  $A_{new} = A^{wt}, A^2$  and  $P_{new} = 1 * 0.625 = 0.625$

Let us now consider the first of these recursive calls, when  $A^1$  is the first successful allele to invade the

population and  $P_{existing}$  for this call is 0.375. In this case, there is only one available mutation,  $m_2$ , which

26 will generate the fully adapted allele  $A^{der}$  with an unconditioned probability of 0.6 but a conditioned  
27 probability of 1. We now have  $S_{new} = A^{der}$  fixed in the population, with a  $P_{new}$  of  $0.375 * 1 = 0.375$ . We  
28 then call the recursive condition again with this new  $S_{new}$ , where we find that the termination condition of  
29 having  $A^{der}$  in  $S_{existing}$  has been reached. Therefore, we are done, and the unconditioned probability of  
30 the mutation order used to get  $A^{der}$  this time, namely  $A^{wt} \xrightarrow{m_1} A^1 \xrightarrow{m_2} A^{der}$  is 0.375.

31 A similar procedure with the other initial recursive call, where  $m_2$  was the first mutation, finds that the  
32 unconditioned probability of the mutation order  $A^{wt} \xrightarrow{m_2} A^2 \xrightarrow{m_1} A^{der}$  is 0.625. Therefore, we find two  
33 viable orders of mutations, one with conditioned probability  $\frac{0.375}{0.375+0.625} = 0.375$  and one with probability  
34  $\frac{0.625}{0.375+0.625} = 0.625$ . Note that with the WEINREICH *et al.* (2006) method, the conditioned probability for a  
35 mutation order always equals its unconditioned probability since the number of mutations introduced into  
36 the population is always equal to the number of mutations in the mutation order. This is not the case in  
37 our diploid model, as we will see below.

38 **Table S1**

| $S_{existing}$ | Mutation          | New Allele $A^n$ | Invasion Prob $P_{A^n}^i$ | $\rho_n$ | $P_{existing}$ | $P_{new}$ | $S_{new}$            | Mutation Order for Adapted Allele $A^{der}$              |
|----------------|-------------------|------------------|---------------------------|----------|----------------|-----------|----------------------|----------------------------------------------------------|
| $A^{wt}$       | $m_1$ on $A^{wt}$ | $A^1$            | 0.3                       | 0.3      | 1              | 0.375     | $A^1$ , freq = 1     |                                                          |
| $A^{wt}$       | $m_2$ on $A^{wt}$ | $A^2$            | 0.5                       | 0.5      | 1              | 0.625     | $A^2$ , freq = 1     |                                                          |
| $A^1$          | $m_2$ on $A^1$    | $A^{der}$        | 0.6                       | 0.6      | 0.375          | 0.375     | $A^{der}$ , freq = 1 | $A^{wt} \xrightarrow{m_1} A^1 \xrightarrow{m_2} A^{der}$ |
| $A^2$          | $m_1$ on $A^2$    | $A^{der}$        | 0.2                       | 0.2      | 0.625          | 0.625     | $A^{der}$ , freq = 1 | $A^{wt} \xrightarrow{m_2} A^2 \xrightarrow{m_1} A^{der}$ |

40 *Diploid example*

41 We then turn to measuring historical predictability in diploids, using a different pair of mutations with  
42 example data in Table S2 and the results in Figure S2. In this case, let us suppose that the  $A^1$  can  
43 successfully invade the ancestral population consisting of  $A^{wt}$  to result in a balanced state consisting of  $A^1$   
44 and  $A^{wt}$  at intermediate frequencies. Meanwhile,  $A^2$  can also successfully invade the ancestral population,  
45 but it fixes, resulting in  $S_{new}$  consisting of  $A^2$  at frequency 1. Given their relative invasion probabilities  
46 and the fact that  $A^{wt}$  was initially fixed, we find that the conditioned probability of  $A^1$  invading  $A^{wt}$  and  
47 resulting in a balanced state =  $1$  (freq of  $A^{wt}$ ) \*  $0.2$  (invasion probability of  $A^1$ ) /  $(1 * 0.2 + 1 * 0.35) =$   
48  $0.36$ , while the probability of  $A^2$  being the next mutation in  $A^{wt}$  is  $0.64$ .

49 For the next recursion step, let us consider the  $S_{existing}$  of  $A^1$  and  $A^{wt}$  at intermediate frequencies. There  
50 are two possible mutations in this scenario, in which mutation  $m_2$  can occur on either  $A^1$  or  $A^{wt}$  to  
51 generate alleles  $A^{der}$  and  $A^2$ , respectively. The successful invasion of  $A^2$  results in a  $S_{new}$  containing a  
52 balanced state consisting of both  $A^1$  and  $A^2$ . The new allele  $A^{der}$  can also successfully invade the  
53 population and results in a stable polymorphism as well. Mutation  $m_1$  is not allowed to occur on  $A^{wt}$ , since  
54 that would regenerate allele  $A^1$  which has already been observed in this trajectory so far. The conditioned  
55 probability of  $A^2$  succeeding in this population is  $\frac{0.7*0.14}{0.7*0.14+0.3*0.6} = 0.35$ , while the conditioned probability  
56 of  $A^{der}$  succeeding is  $0.65$ . The running probability of these two mutation orders after two mutations have  
57 been introduced in the population are  $0.36 * 0.35 = 0.126$  and  $0.36 * 0.65 = 0.234$ , respectively.

58 Now let us consider the mutations on the  $S_{existing}$  where both  $A^1$  and  $A^2$  exist as a balanced  
59 polymorphism. In this situation, there are two possible mutations, where  $m_1$  can arise on  $A^2$  to give the  
60 adapted allele  $A^{der}$ , and  $m_2$  can arise on  $A^1$  to also give the adapted allele  $A^{der}$ . Even though this is the  
61 same allele being generated by the two mutations, the initial frequency of  $A^1$  and  $A^2$  are different, giving  
62 rise to different unconditioned probabilities of their occurrence. The  $m_1$  mutation has a conditioned  
63 probability of  $\frac{0.8*0.4}{0.8*0.4+0.2*0.4} = 0.8$ , while the  $m_2$  mutation has a conditioned probability of  $0.2$ . The  
64 running probability after each of these mutations are  $0.36 * 0.35 * 0.8 = 0.1008$  and  
65  $0.36 * 0.35 * 0.2 = 0.0252$ , respectively.

66 The final possible trajectory, where  $m_2$  occurred first on  $S_{existing} = A^{wt}$  and resulted in the fixation of  $A^2$   
67 has only one possible mutation. This is mutation  $m_1$  on  $A^2$  resulting in the allele  $A^{der}$ . Supposing that  
68  $A^{der}$  is deleterious in this situation, it cannot invade and therefore has  $0$  probability of occurring. We then

69 terminate this recursion as there are no valid beneficial mutations available to this population.

70 Finally, we now need to compute the conditioned likelihoods of each mutation order. We managed to  
71 successfully get  $A^{der}$  in 3 different ways when considering the mutations introduced into the population,  
72 but only 2 different ways when considering the mutations introduced onto the allele that generated  $A^{der}$ .  
73 The unconditioned probabilities of these two different mutation orders are:  $0.234 + 0.0252 = 0.2592$  for  
74 mutation order  $M_1 = A^{wt} \xrightarrow{m_1} A^1 \xrightarrow{m_2} A^{der}$  and  $0.1008$  for mutation order  $M_2 = A^{wt} \xrightarrow{m_2} A^2 \xrightarrow{m_1} A^{der}$ .  
75 The conditioned probabilities for these two mutation orders are thus  $\frac{0.2592}{0.2592+0.1008} = 0.72$  and  
76  $\frac{0.1008}{0.2592+0.1008} = 0.28$ , respectively.

77

**Table S2**

| $S_{existing}$                        | Mutation          | $A^n$     | $P_{A^n}^i$ | $\rho_n$ | $P_{existing}$ | $P_{new}$ | $S_{new}$                                 | Mutation Order of $A^{der} \in S_{new}$                  |
|---------------------------------------|-------------------|-----------|-------------|----------|----------------|-----------|-------------------------------------------|----------------------------------------------------------|
| $A^{wt}$                              | $m_1$             | $A^1$     | 0.2         | 0.2      | 1              | 0.36      | $A^1$ freq = 0.3, $A^{wt}$ freq = 0.7     |                                                          |
| $A^{wt}$                              | $m_2$             | $A^2$     | 0.35        | 0.35     | 1              | 0.64      | $A^2$ freq = 1                            |                                                          |
| $A^1$ freq = 0.3, $A^{wt}$ freq = 0.7 | $m_2$ on $A^{wt}$ | $A^2$     | 0.14        | 0.098    | 0.36           | 0.126     | $A^1$ freq = 0.2, $A^2$ freq = 0.8        |                                                          |
| $A^1$ freq = 0.3, $A^{wt}$ freq = 0.7 | $m_2$ on $A^1$    | $A^{der}$ | 0.6         | 0.18     | 0.36           | 0.234     | $A^{der}$ freq = 0.8, $A^{wt}$ freq = 0.2 | $A^{wt} \xrightarrow{m_1} A^1 \xrightarrow{m_2} A^{der}$ |
| $A^1$ freq = 0.2, $A^2$ freq = 0.8    | $m_1$ on $A^2$    | $A^{der}$ | 0.4         | 0.32     | 0.126          | 0.1008    | $A^{der}$ freq = 1                        | $A^{wt} \xrightarrow{m_2} A^2 \xrightarrow{m_1} A^{der}$ |
| $A^1$ freq = 0.2, $A^2$ freq = 0.8    | $m_2$ on $A^1$    | $A^{der}$ | 0.4         | 0.08     | 0.126          | 0.0252    | $A^{der}$ freq = 1                        | $A^{wt} \xrightarrow{m_1} A^1 \xrightarrow{m_2} A^{der}$ |
| $A^2$ freq = 1                        | $m_1$ on $A^2$    | $A^{der}$ | 0           | 0        | 0.64           | 0         | $A^2$ freq = 1                            |                                                          |

79

SUPPLEMENTARY FIGURES

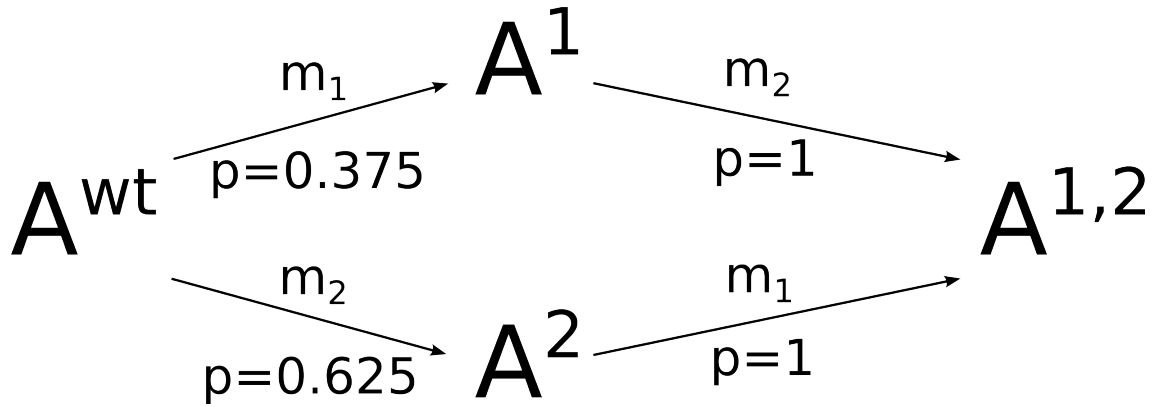

82 **Figure S1.** Along with table S1, a simple example of measuring genotypic historical predictability in  
 83 haploids. Arrows represent transitions after the introduction of an available mutation into the population,  
 84 with the mutation above the arrow and the conditioned probability of the mutation successfully being  
 85 generated and invading the population below the arrow.

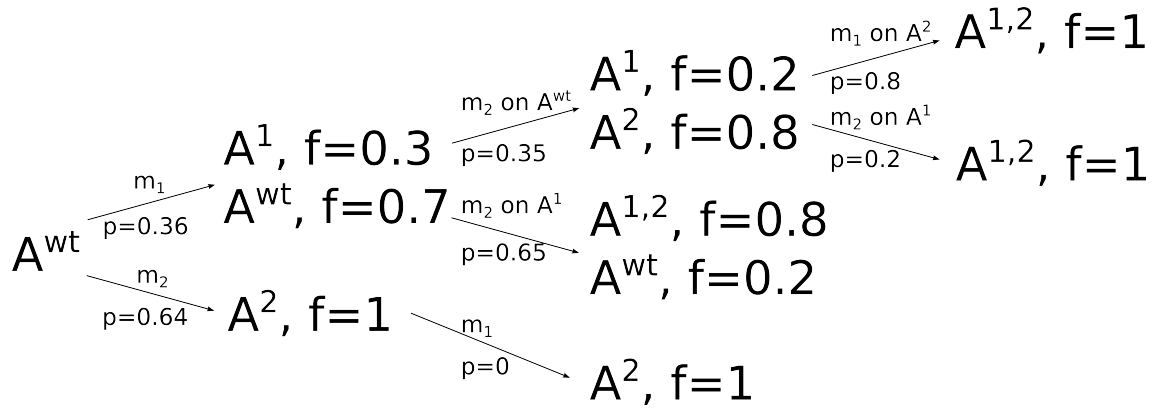

86

87 **Figure S2.** Along with table S2, a simple example of measuring genotypic historical predictability in  
 88 diploids. Note that this example uses a different set of mutations than the example for the haploid method.  
 89 Arrows represent transitions after the introduction of an available mutation into the population, with the  
 90 mutation above the arrow and the conditioned probability of the mutation successfully being generated and  
 91 invading the population below the arrow. Successful mutations that result in a balanced polymorphism are  
 92 represented by the presence of multiple alleles each at some frequency ( $f$ ).



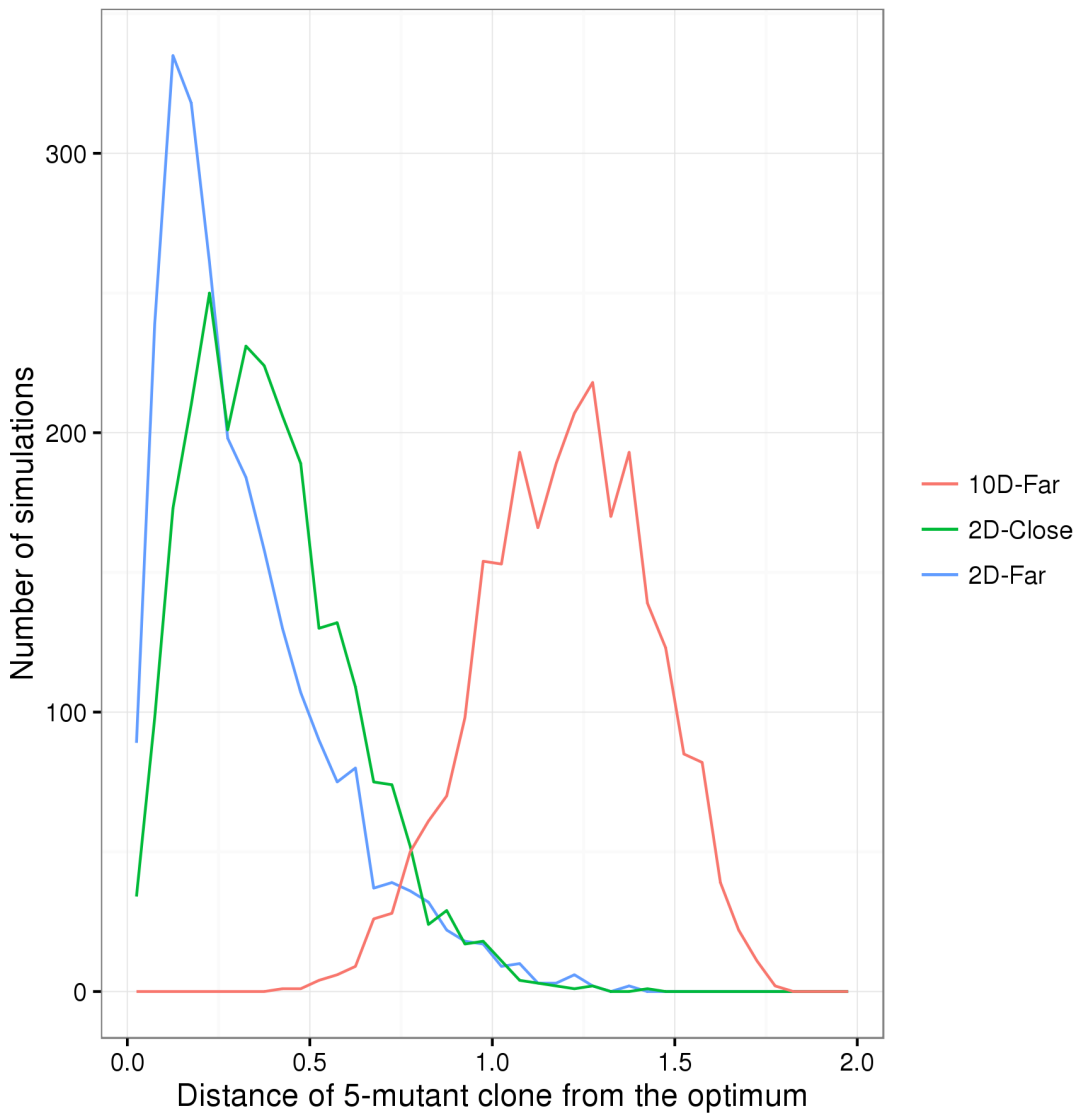

93

94 **Figure S3.** Distribution of the distance to the optimum of the 5-mutant genotype from the haploid  
 95 simulations across all parameter regimes. A lower dimensionality allows the population to be  
 96 phenotypically closer to the optimum (10D-Far vs 2D-Far), as does evolving on a more peaked landscape  
 97 (2D-Far vs 2D-Close), consistent with prior studies (BLANQUART *et al.* 2014).

- 98 BLANQUART, F., G. ACHAZ, T. BATAILLON, and O. TENAILLON, 2014 Properties of selected mutations  
99 and genotypic landscapes under Fisher's geometric model. *Evolution* (N. Y). **68**: 3537–3554.
- 100 WEINREICH, D. M., N. F. DELANEY, M. A. DEPRISTO, and D. L. HARTL, 2006 Darwinian evolution can  
101 follow only very few mutational paths to fitter proteins. *Science* **312**: 111–4.
